# Supplementary material for: Renewable high density fuels containing tricyclic sesquiterpanes and alkyl diamondoids
Source: Royal Society of Chemistry journal article supplement (doi:10.1039/c6se00108d), 2017-01-01
Supplement: c6se00108d1.pdf [file c6se00108d1.pdf]

## Supporting Information For

# Renewable High Density Fuels Containing Tricyclic Sesquiterpanes and Alkyl Diamondoids

Kale W. Harrison and Benjamin G. Harvey\*

US NAVY, NAWCWD, Research Department, Chemistry Division, China Lake, California  
93555

## Contents

|                                                                            |    |
|----------------------------------------------------------------------------|----|
| Figure S1. <sup>1</sup> H NMR spectrum of cedarwood oil.....               | S2 |
| Figure S2. <sup>1</sup> H NMR spectrum of hydrogenated cedarwood oil.....  | S2 |
| Figure S3. <sup>13</sup> C NMR spectrum of cedarwood oil .....             | S3 |
| Figure S4. <sup>13</sup> C NMR spectrum of hydrogenated cedarwood oil..... | S3 |
| Figure S5. <sup>1</sup> H NMR spectrum of $\alpha$ -cedrene .....          | S4 |
| Figure S6. <sup>13</sup> C NMR spectrum of $\alpha$ -cedrene .....         | S4 |
| Figure S7. <sup>1</sup> H NMR spectrum of cedrane.....                     | S5 |
| Figure S8. <sup>13</sup> C NMR spectrum of cedrane.....                    | S5 |
| Figure S9. <sup>1</sup> H NMR spectrum of ETMA.....                        | S6 |
| Figure S10. <sup>13</sup> C NMR spectrum of ETMA.....                      | S6 |
| Figure S11. DSC data for hydrogenated cedarwood oil.....                   | S7 |
| Figure S12. DSC data for cedrane.....                                      | S7 |
| Figure S13. DSC data for ETMA .....                                        | S8 |

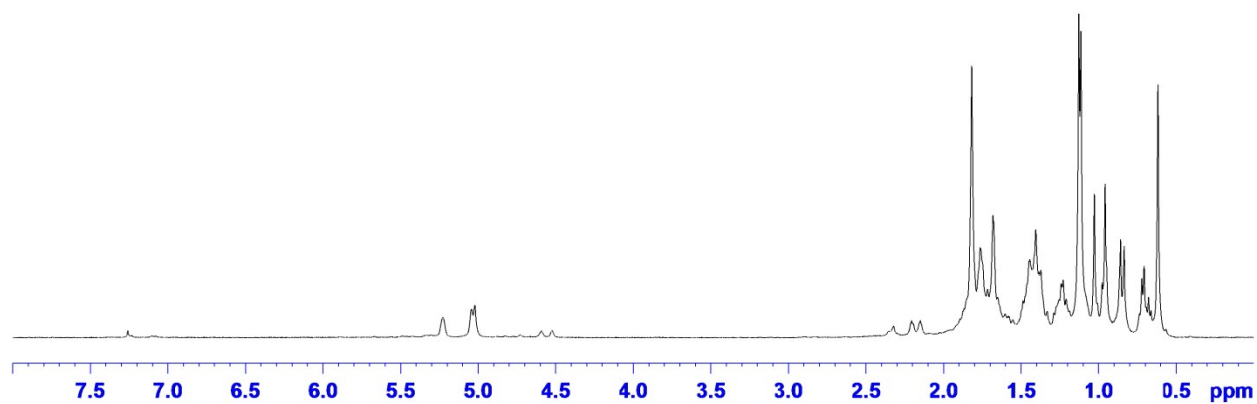

Figure S1.  $^1\text{H}$  NMR spectrum of cedarwood oil

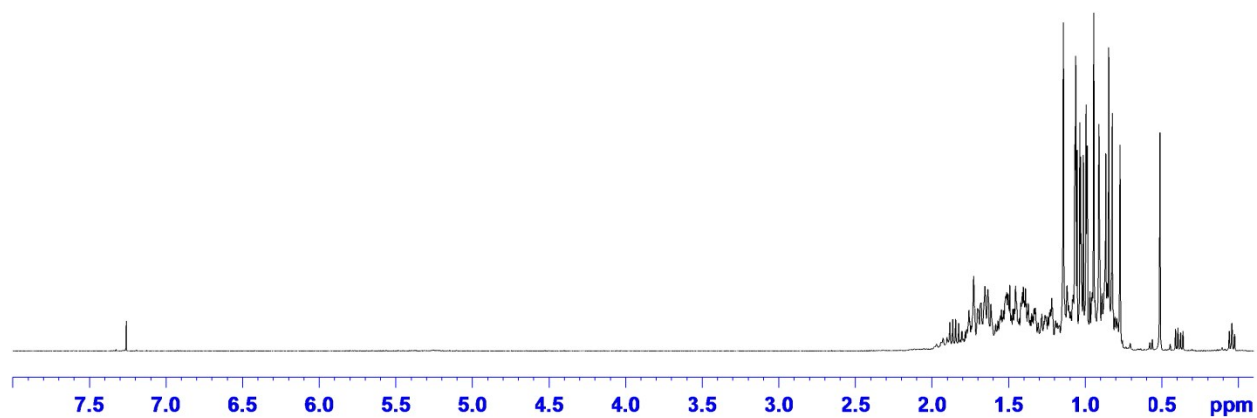

Figure S2.  $^1\text{H}$  NMR spectrum of hydrogenated cedarwood oil

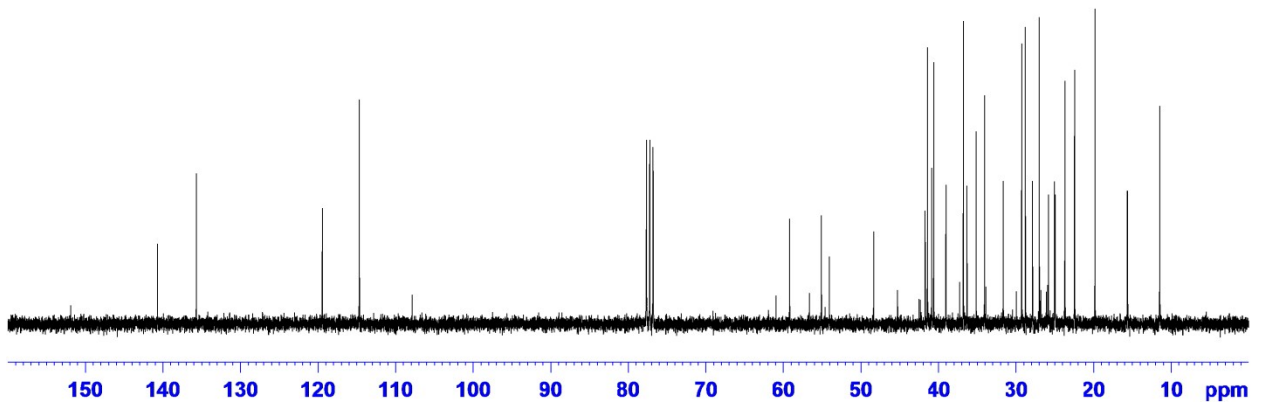

Figure S3.  $^{13}\text{C}$  NMR spectrum of cedarwood oil

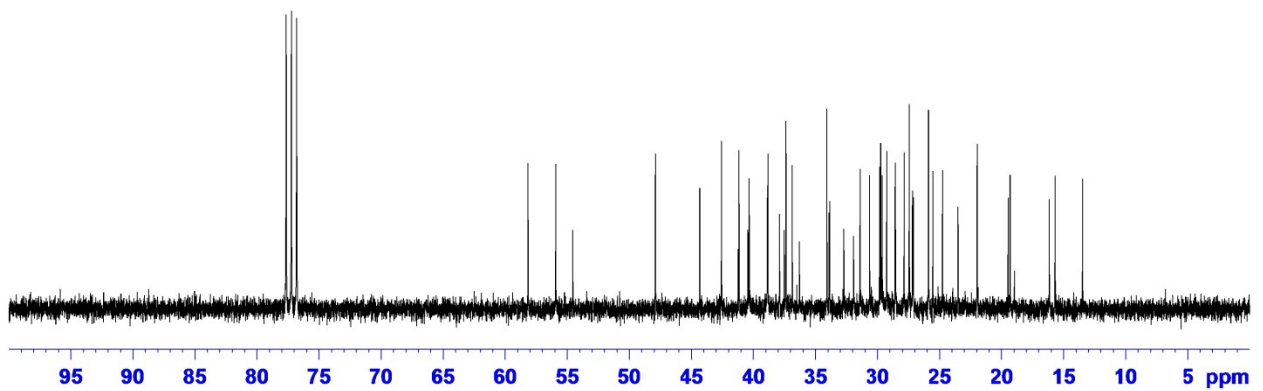

Figure S4.  $^{13}\text{C}$  NMR spectrum of hydrogenated cedarwood oil

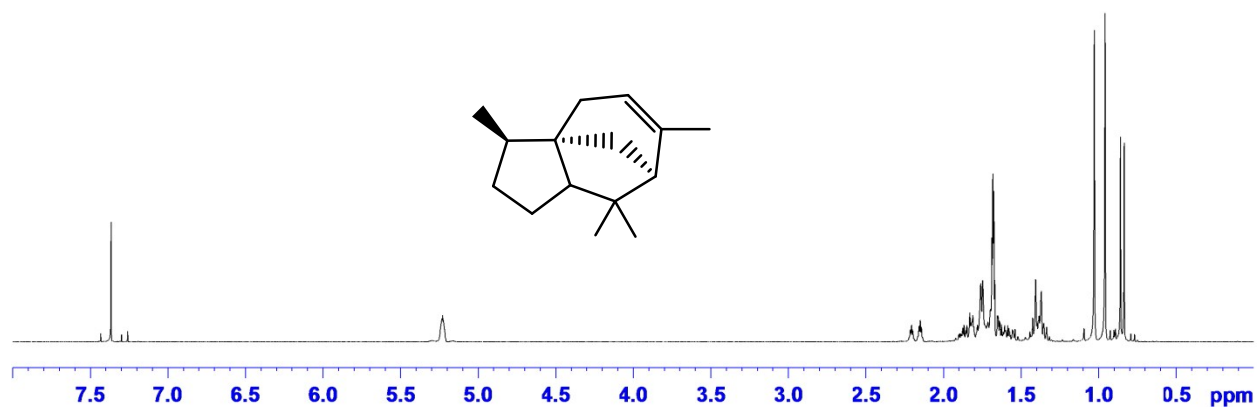

Figure S5.  $^1\text{H}$  NMR spectrum of  $\alpha$ -cedrene

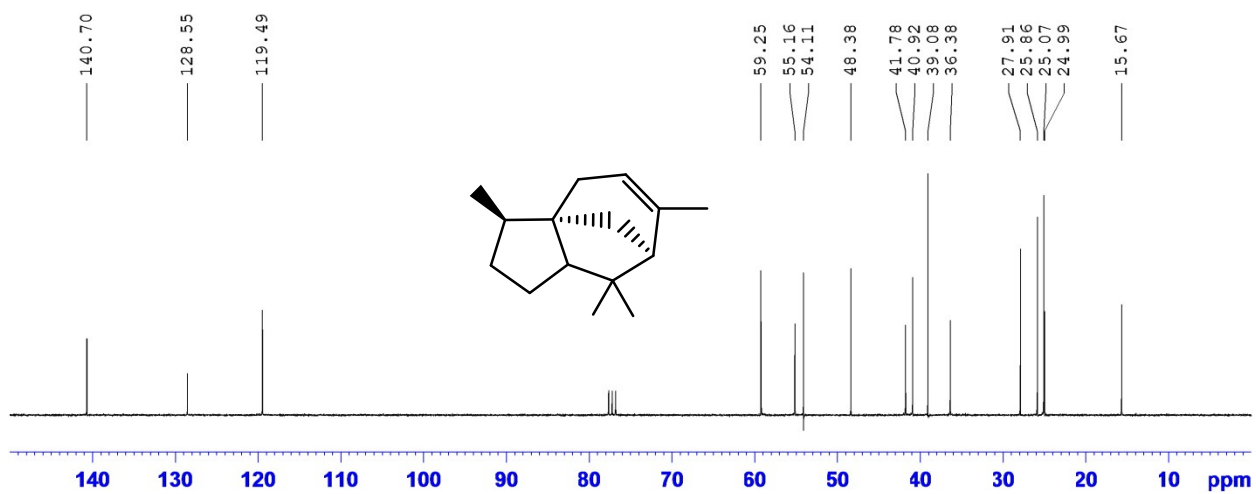

Figure S6.  $^{13}\text{C}$  NMR spectrum of  $\alpha$ -cedrene

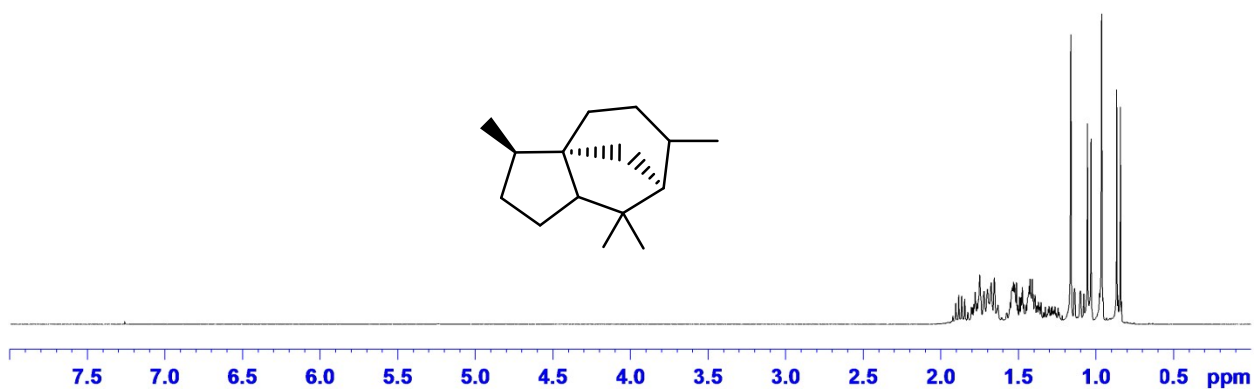

Figure S7.  $^1\text{H}$  NMR spectrum of cedrane

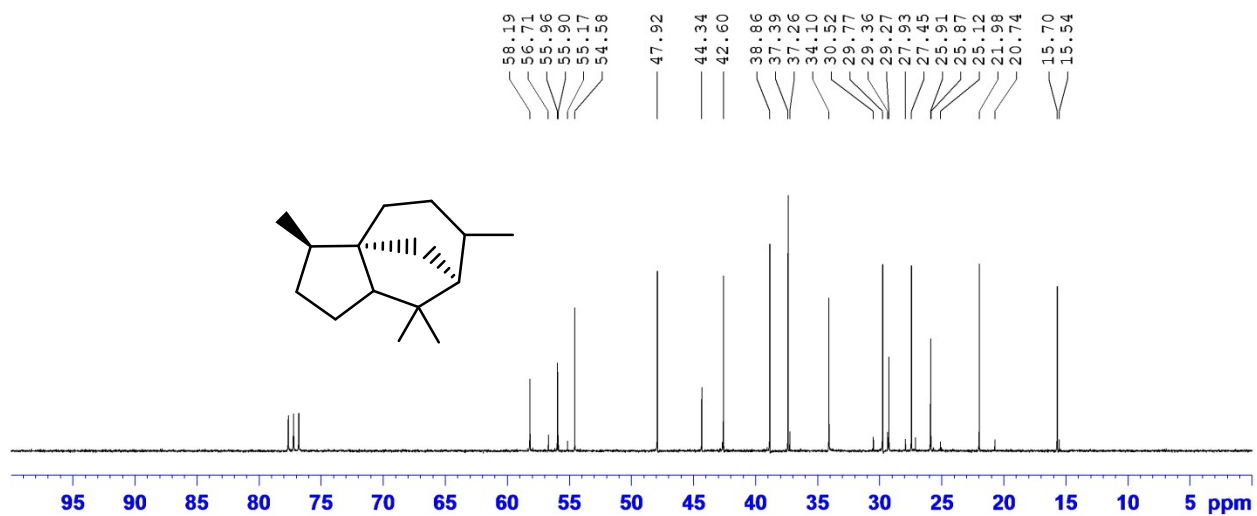

Figure S8.  $^{13}\text{C}$  NMR spectrum of cedrane

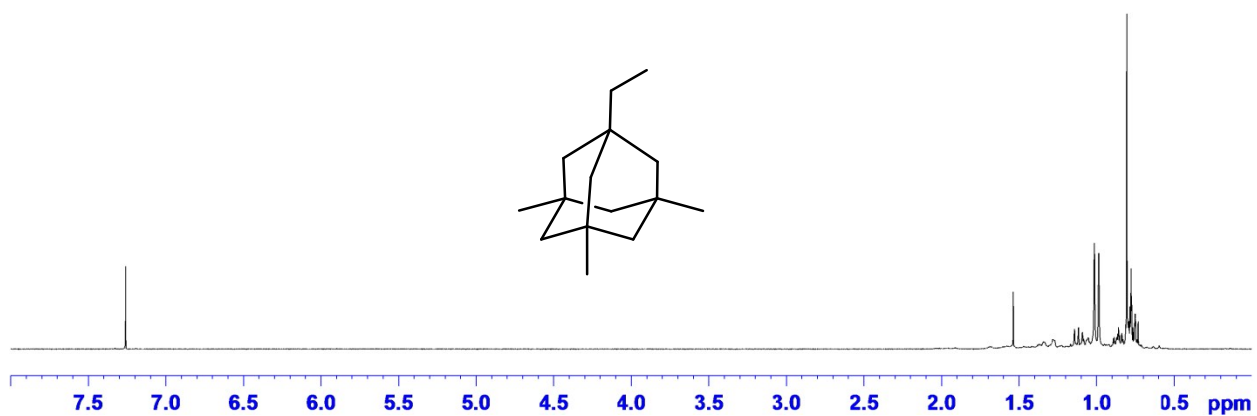

Figure S9. <sup>1</sup>H NMR spectrum of ETMA

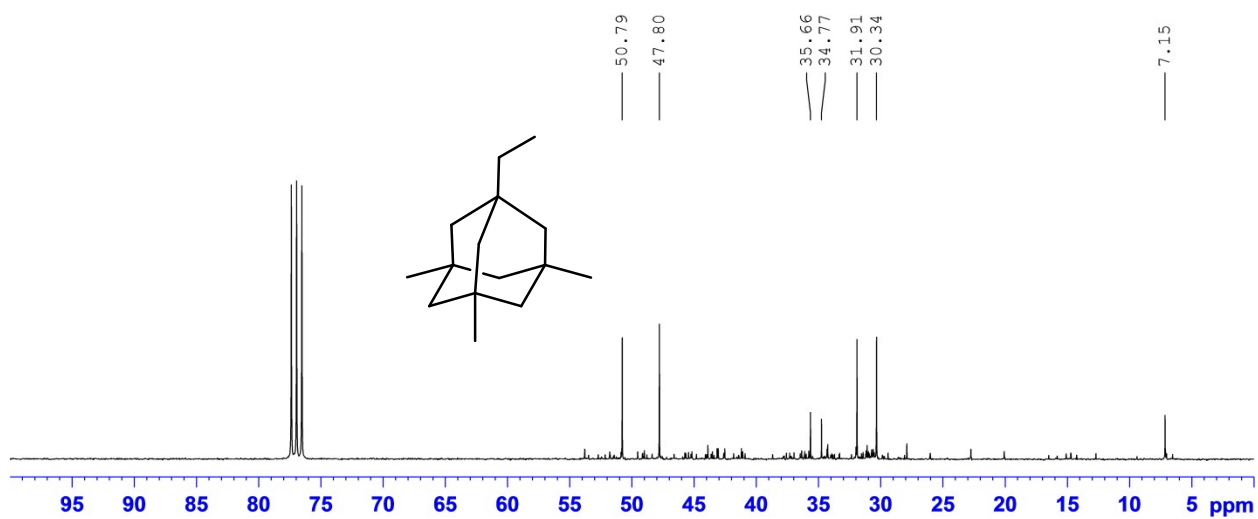

Figure S10. <sup>13</sup>C NMR spectrum of ETMA

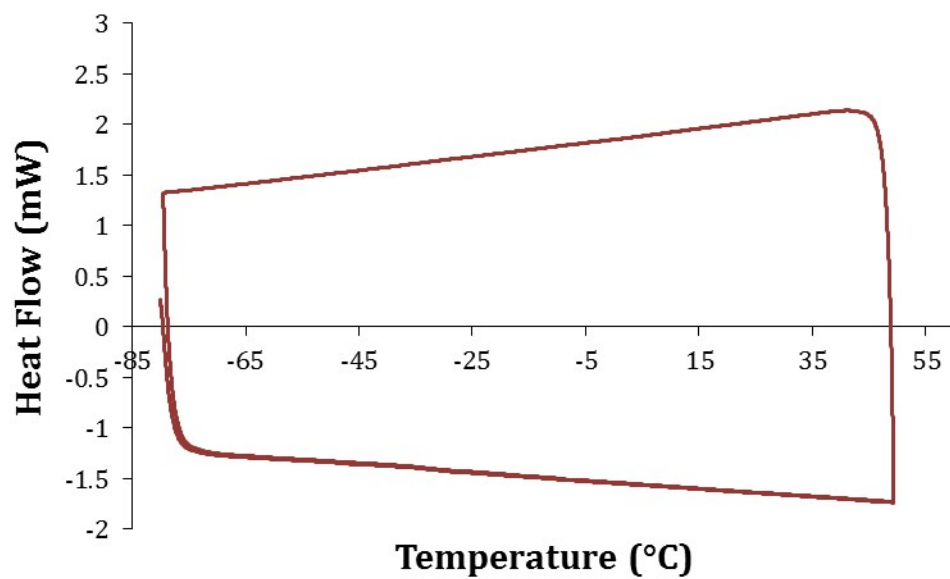

Figure S11. DSC data for hydrogenated cedarwood oil

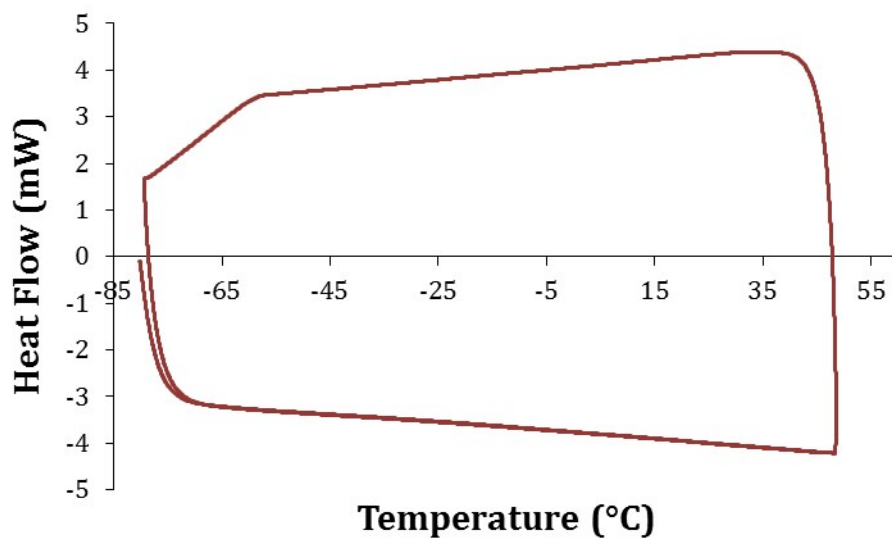

Figure S12. DSC data for cedrane

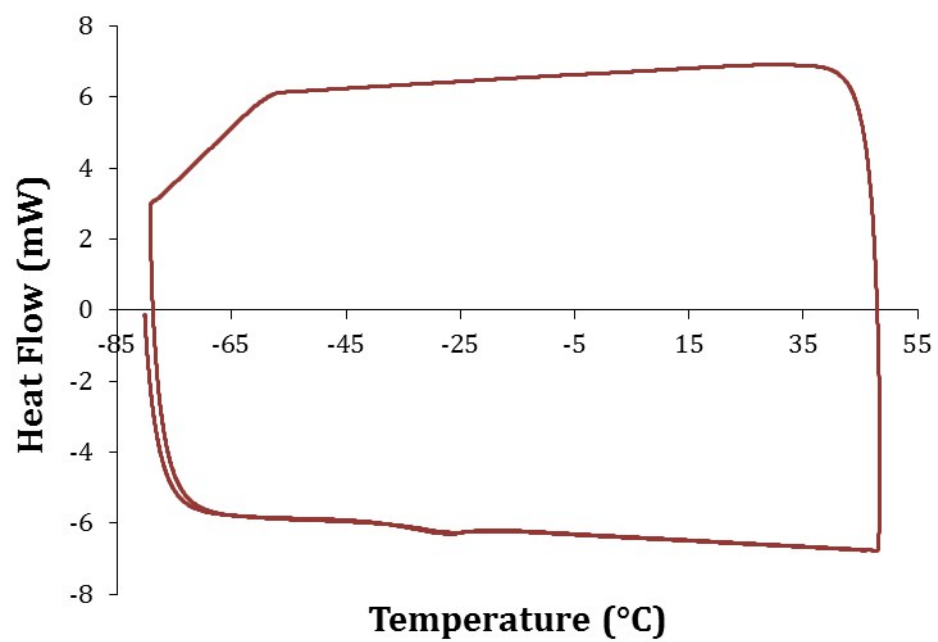

Figure S13. DSC data for ETMA
